# Supplementary material for: Recurrent Moderate Hypoglycemia Ameliorates Brain Damage and Cognitive Dysfunction Induced by Severe Hypoglycemia
Source: PubMed Central journal article supplement — Diabetes. 2010 Jan 19;59(4):1055–62. doi: 10.2337/db09-1495 (PMC2844814; doi:10.2337/db09-1495), 2010-01-19
Supplement: supp_db09-1495_DB09-1495_Online_Appendix.pdf [file supp_db09-1495_DB09-1495_Online_Appendix.pdf]

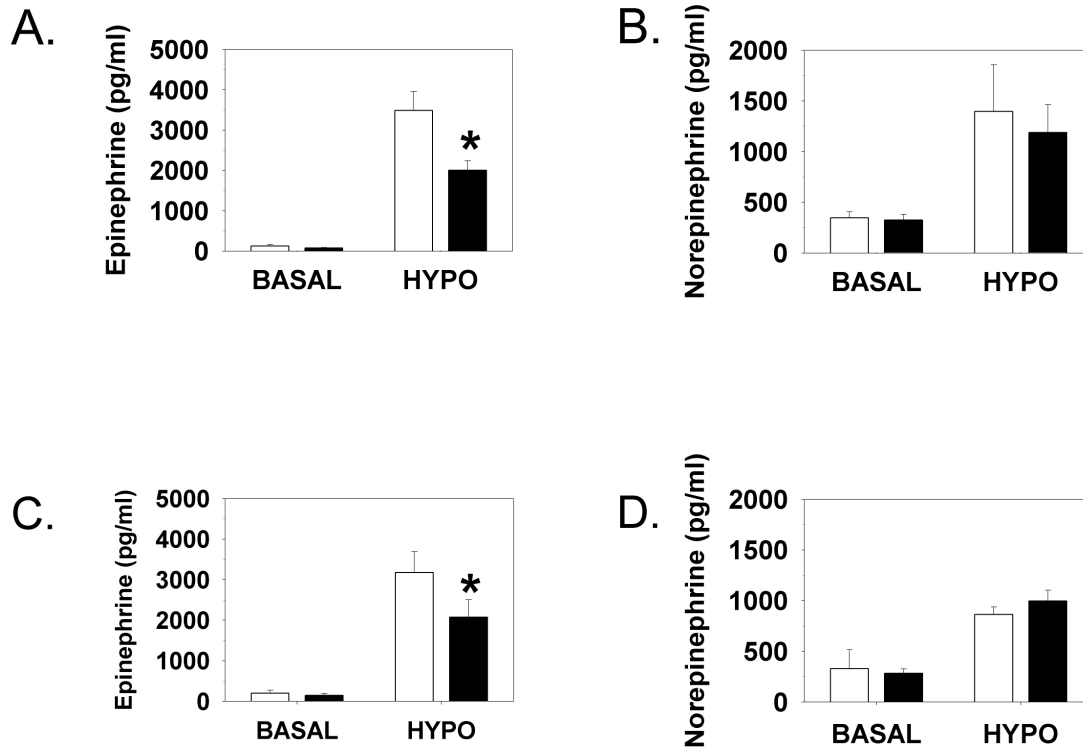

**Supplementary Figure 1. Attenuated epinephrine response to hypoglycemia in rats exposed to recurrent moderate hypoglycemia.** (A) Epinephrine levels were measured before the onset (basal) and during severe hypoglycemia. Although not different during the basal period, as expected the RH-SH60 rats (black bar) had an attenuated epinephrine response to hypoglycemia compared to CON-SH60 rats (white bar) (\*  $p < 0.05$ , by Student t-test). (B) Norepinephrine levels were not different during either the basal period and rose to a similar levels during severe hypoglycemia for RH-SH60 and CON-SH60 rats. (C) RH-SH90 rats (black bar) had a significantly attenuated epinephrine response to hypoglycemia compared to CON-SH90 (white bar) rats (\*  $p < 0.05$ , by Student t-test). (D) Norepinephrine levels were similar between RH-SH90 and CON-SH90 during the basal period and rose to a similar extent in response to severe hypoglycemia during the hyperinsulinemic clamp.

CON-SH90

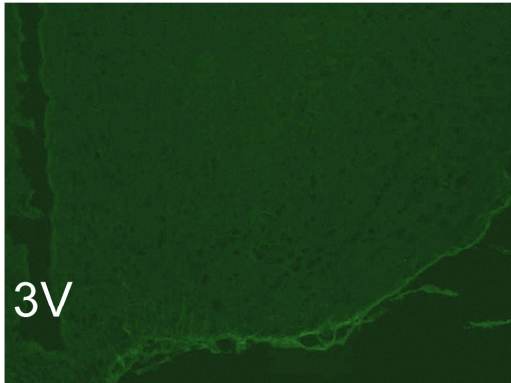

RH-SH90

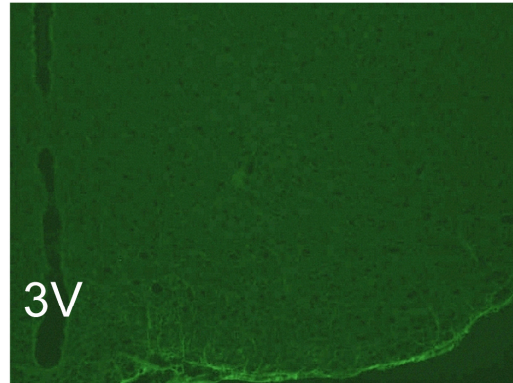

**Supplementary Figure 2.** Fluoro-Jade B staining of the hypothalamus. One week after a 90 min episode of severe hypoglycemia, no Fluoro-Jade B staining was observed in the hypothalamus of either CON-SH90 and RH-SH90 groups. The third ventricle (3V) is denoted in the figures. (45X magnification).

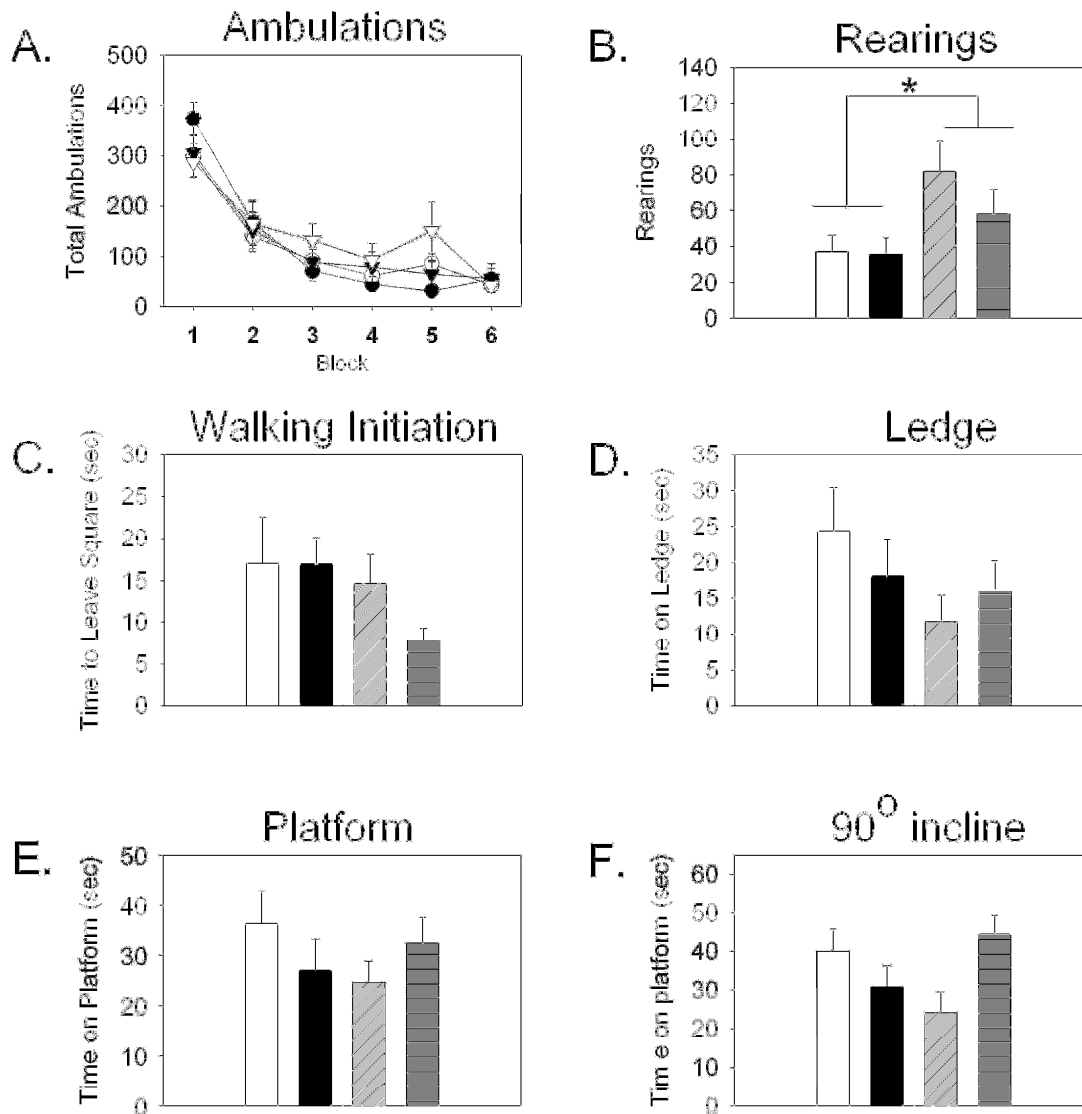

**Supplementary Figure 3. Locomotor activity and sensorimotor function 6-8 weeks following severe hypoglycemia or euglycemic clamp.** (A) No significant differences were observed between groups in terms of ambulations (CON-EUG, open triangle, n=7; RH-EUG, closed triangle, n=9; CON-SH90, open circle, n=11; RH-SH90, closed circle, n=9). (B) The SH90 groups (CON-SH90, diagonal hatch, and RH-SH90, grey horizontal hatch) exhibited significantly ( $p = 0.017$ ) more rearing than the EUG groups (CON-EUG, white bar, and RH-EUG, black bar). Sensorimotor function was also assessed by walking initiation task (C), ability to balance on a ledge (D), remain on a platform (E), or stay on a 90° inclined screen (F). Analyses conducted on the data from these tests indicate no sensorimotor deficits in rats exposed to severe hypoglycemia.

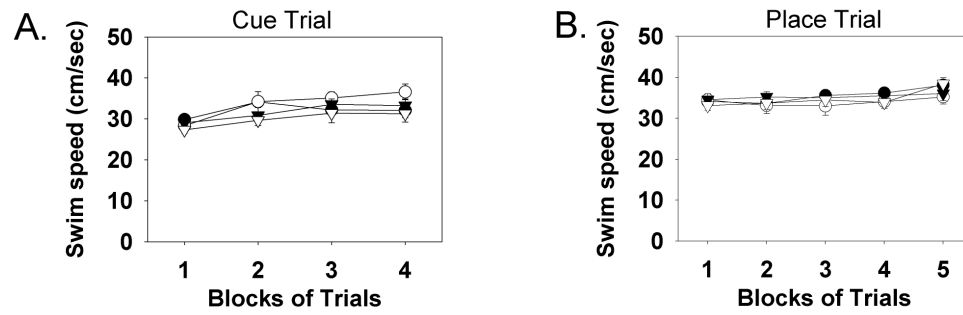

**Supplementary Figure 4. Swim speeds during the Morris water maze test.** Morris water maze testing was performed 6-8 weeks following severe hypoglycemic or euglycemic clamps. During the cue trial (A) and the place trial (B), no significant difference in swim speeds were observed between CON-EUG (open triangle, n=7), RH-EUG (closed triangle, n=9), CON-SH90 (open circles, n=11), and RH-SH90 (closed circles, n=9).
